# Supplementary material for: Formative peer assessment in higher healthcare education programmes: a scoping review
Source: HighWire-hosted journal article supplement (doi:10.1136/bmjopen-2020-045345), 2021-02-01
Supplement: bmjopen-2020-045345supp001_data_supplement.pdf [file bmjopen-2020-045345supp001_data_supplement.pdf]

Appendix 1. Presentation of the search strategy and results from the Pub Med database until 28<sup>th</sup> of May, 2019.

| Search block 1: Healthcare education |                                                                                                                     |
|--------------------------------------|---------------------------------------------------------------------------------------------------------------------|
| #                                    | MESH-terms                                                                                                          |
| 1                                    | "Students, Medical"[Mesh] OR                                                                                        |
| 2                                    | "Students, Nursing"[Mesh] OR                                                                                        |
| 3                                    | "Students, Dental"[Mesh] OR                                                                                         |
| 4                                    | "Students, Health Occupations"[Mesh] OR                                                                             |
| 5                                    | "Education, Medical"[Mesh] OR                                                                                       |
| 6                                    | "Education, Nursing"[Mesh] OR                                                                                       |
| 7                                    | "Education, Dental"[Mesh] OR                                                                                        |
| 8                                    | "Midwifery/education"[Mesh] OR                                                                                      |
| 9                                    | "Allied Health Personnel/education"[Mesh]                                                                           |
| 10                                   | S1 OR S2 OR S3 OR S4 OR S5 OR S6 OR S7 OR S8 OR S9                                                                  |
| #                                    | Free text terms                                                                                                     |
| 11                                   | "medical student*" OR                                                                                               |
| 12                                   | "nursing student*" OR                                                                                               |
| 13                                   | "midwifery student*" OR                                                                                             |
| 14                                   | "dental student*" OR                                                                                                |
| 15                                   | "physical therapy student*" OR                                                                                      |
| 16                                   | "occupational therapy student*" OR                                                                                  |
| 17                                   | "allied health student*" OR                                                                                         |
| 18                                   | "health occupations student*" OR                                                                                    |
| 19                                   | "health care stud*" OR                                                                                              |
| 20                                   | "Health care education" OR                                                                                          |
| 21                                   | "health science education" OR                                                                                       |
| 22                                   | "Medical education" OR                                                                                              |
| 23                                   | "Nursing education" OR                                                                                              |
| 24                                   | "Dental education" OR                                                                                               |
| 25                                   | "allied health education" OR                                                                                        |
| 26                                   | "Health occupation* education*" OR                                                                                  |
| 27                                   | "midwifery education"                                                                                               |
| 28                                   | S11 OR S12 OR S13 OR S14 OR S15 OR S16 OR S17 OR S18 OR S19 OR S20 OR S21 OR S22 OR S23 OR S24 OR S25 OR S26 OR S27 |
| 29                                   | S10 OR S28                                                                                                          |

| Search block 2: Peer assessment |                                                                                  |
|---------------------------------|----------------------------------------------------------------------------------|
| #                               | MESH                                                                             |
| 31                              | "Educational Measurement"[Mesh] OR                                               |
| 32                              | "Peer Group"[Mesh] OR                                                            |
| 33                              | "Peer Review"[Mesh]                                                              |
| 34                              | S31 OR S32 OR S33                                                                |
| #                               | Free text terms                                                                  |
| 35                              | "peer assessment" OR                                                             |
| 36                              | "peer evaluation" OR                                                             |
| 37                              | "peer observation" OR                                                            |
| 38                              | "peer feedback" OR                                                               |
| 39                              | "peer review" OR                                                                 |
| 40                              | "peer assess*" OR                                                                |
| 41                              | "*peer assess" OR                                                                |
| 42                              | "peer examiner" OR                                                               |
| 43                              | "peer grad*" OR                                                                  |
| 44                              | "peer group" OR                                                                  |
| 45                              | "Student performance appraisal" OR                                               |
| 46                              | "educational measurement"                                                        |
| 47                              | S35 OR S36 OR S37 OR S38 OR S39 OR S40 OR S41 OR S42 OR S43 OR S44 OR S45 OR S46 |
| 48                              | S34 OR S47                                                                       |

|    | Search block 3: Formative assessment          |
|----|-----------------------------------------------|
| #  | MESH                                          |
| 49 | "Formative Feedback"[Mesh]                    |
| #  | Free text terms                               |
| 50 | "Formative evaluation" OR                     |
| 51 | "Formative feedback" OR                       |
| 52 | "Formative assessment" OR                     |
| 53 | "Formative* assess*" OR                       |
| 54 | "Formativ* evaluation" OR                     |
| 55 | Formativ* OR                                  |
| 56 | "formative evaluation research"               |
| 57 | S37 OR S38 OR S39 OR S40 OR S41 OR S42 OR S43 |
| 58 | S49 OR S57                                    |

| #  | Combination of search blocks 1, 2, and 3 |
|----|------------------------------------------|
| 59 | S29 AND S48 AND S58                      |
