# Supplementary material for: Formative peer assessment in higher healthcare education programmes: a scoping review
Source: HighWire-hosted journal article supplement (doi:10.1136/bmjopen-2020-045345), 2021-02-01
Supplement: bmjopen-2020-045345supp002_data_supplement.pdf [file bmjopen-2020-045345supp002_data_supplement.pdf]

## Appendix 2. Charting form

CHARTING FORMARTICLE NO:TITLE:AUTHOR/S:YEAR OF PUBLICATION:COUNTRY:RESEARCH DESIGN:

QUANTITATIVE

☐

QUALITATIVE

☐

OTHER:

☐METHOD:AIM:NUMBER OF PARTICIPANTS (n=):SETTING:

MEDICAL EDUCATION

☐

NURSING EDUCATION

☐

MIDWIFERY EDUCATION

☐

PHYSIOTHERAPY EDUCATION

☐

OCCUPATIONAL THERAPY

☐

DENTAL EDUCATION

☐

OTHER

☐

DOES THE STUDY PRESENT?

|                      |     |    |
|----------------------|-----|----|
| HOW PEER ASSESSEMENT | YES | NO |
|----------------------|-----|----|

|                             |  |  |
|-----------------------------|--|--|
| INTERVENTIONS ARE DELIVERED |  |  |
|-----------------------------|--|--|

|                 |     |    |
|-----------------|-----|----|
| PEER ASSESSMENT | YES | NO |
|-----------------|-----|----|

|                      |     |    |
|----------------------|-----|----|
| FORMATIVE ASSESSMENT | YES | NO |
|----------------------|-----|----|

|                     |     |    |
|---------------------|-----|----|
| STUDENTS EXPERIENCE | YES | NO |
|---------------------|-----|----|

|                     |     |    |
|---------------------|-----|----|
| TEACHERS EXPERIENCE | YES | NO |
|---------------------|-----|----|

OTHER:

|                              |     |    |
|------------------------------|-----|----|
| OUTCOME/S OF PEER ASSESSMENT | YES | NO |
|------------------------------|-----|----|

|              |  |  |
|--------------|--|--|
| INTERVENTION |  |  |
|--------------|--|--|

|                                 |     |    |
|---------------------------------|-----|----|
| RATIONALE/S FOR PEER ASSESSMENT | YES | NO |
|---------------------------------|-----|----|

|              |  |  |
|--------------|--|--|
| INTERVENTION |  |  |
|--------------|--|--|

MAIN FINDINGS:

|                  |     |    |
|------------------|-----|----|
| <u>INCLUDED:</u> | YES | NO |
|------------------|-----|----|

REASON/S FOR EXCLUSION:

(Only to be answered if the study is to be included)

**Grading according to the Critical Appraisal Skills Program (CASP)**QUALITATIVE STUDIES AND SYSTEMATIC REVIEWS

LOW ☐ MODERATE ☐ HIGH ☐

RCT AND CASE CONTROL STUDIES

LOW ☐ MODERATE ☐ HIGH ☐

COHORT STUDIES

LOW ☐ MODERATE ☐ HIGH ☐

**Grading according to The Mixed Method Appraisal Tool**MIXED METHOD STUDIES

LOW ☐ MODERATE ☐ HIGH ☐

**Grading according to the Joanna Briggs Institute Critical Appraisal Tool**QUASI-EXPERIMENTAL STUDIES

LOW ☐ MODERATE ☐ HIGH ☐

ANALYTICAL CROSS SECTIONAL STUDIES

LOW ☐ MODERATE ☐ HIGH ☐

CASE REPORTS

LOW ☐ MODERATE ☐ HIGH ☐

Reviewed by:

(Signature and date)
